# Supplementary material for: Identifying differentially expressed genes from cross-site integrated data based on relative expression orderings
Source: PubMed Central journal article supplement — Int J Biol Sci. 2018 May 22;14(8):892–900. doi: 10.7150/ijbs.24548 (PMC6036750; doi:10.7150/ijbs.24548), 2018-05-22
Supplement: ijbsv14p0892s1.pdf [file ijbsv14p0892s1.pdf]

Supplementary Table S1: Consistency evaluation for DEGs identified by RankCompV2 in signal dataset.

| Disease | Dataset1 | Dataset2 | Overlap <sup>a</sup> | DEGs_con <sup>b</sup> | Consistency | POG1 <sup>c</sup> | POG2 <sup>d</sup> |
|---------|----------|----------|----------------------|-----------------------|-------------|-------------------|-------------------|
| COAD    | GSE37364 | GSE23878 | 2480                 | 2440                  | 98.39%      | 48.15%            | 63.25%            |
|         | GSE37364 | GSE20916 | 2306                 | 2234                  | 96.88%      | 44.09%            | 59.86%            |
|         | GSE23878 | GSE20916 | 2167                 | 2148                  | 99.12%      | 55.68%            | 57.56%            |
| ESCC    | GSE29001 | GSE20347 | 471                  | 471                   | 100.00%     | 82.78%            | 19.01%            |
|         | GSE29001 | GSE38129 | 457                  | 457                   | 100.00%     | 80.32%            | 22.29%            |
|         | GSE20347 | GSE38129 | 1743                 | 1734                  | 100.00%     | 69.98%            | 84.59%            |
| BRCA    | Batch 96 | Batch109 | 3482                 | 3482                  | 100.00%     | 80.03%            | 60.04%            |
|         | Batch 93 | Batch109 | 4869                 | 4869                  | 100.00%     | 78.52%            | 83.96%            |
|         | Batch 93 | Batch96  | 3655                 | 3655                  | 100.00%     | 58.94%            | 84.00%            |

Note: <sup>a</sup> the number of the overlapping DEGs from the two datasets, <sup>b</sup> the number of the consistent DEGs from the two datasets. <sup>c, d</sup> POG1 (or POG2) denotes the percentage of the consistent DEGs identified from the two datasets in all DEGs identified in dataset1 (or dataset2).

Supplementary Table S2: The enriched biological pathways by the DEGs in RD groups.

| GOid                                                          | Name                                                                                                                      | Ref<br>num | Interest<br>num | pvalue   | adjustp  |
|---------------------------------------------------------------|---------------------------------------------------------------------------------------------------------------------------|------------|-----------------|----------|----------|
| The enriched biological pathways of ER negative breast cancer |                                                                                                                           |            |                 |          |          |
| GO:0000278                                                    | mitotic cell cycle                                                                                                        | 760        | 89              | <1.0E-16 | <1.0E-16 |
| GO:0006260                                                    | DNA replication                                                                                                           | 249        | 37              | 3.86E-14 | 8.22E-11 |
| GO:0006261                                                    | DNA-dependent DNA replication                                                                                             | 105        | 22              | 6.71E-12 | 7.79E-09 |
| GO:0006281                                                    | DNA repair                                                                                                                | 326        | 36              | 5.69E-10 | 4.03E-07 |
| GO:0000075                                                    | cell cycle checkpoint                                                                                                     | 213        | 26              | 1.99E-08 | 9.78E-06 |
| GO:0071103                                                    | DNA conformation change                                                                                                   | 160        | 22              | 2.91E-08 | 1.38E-05 |
| GO:0006312                                                    | mitotic recombination                                                                                                     | 35         | 9               | 2.02E-06 | 0.0005   |
| GO:0008608                                                    | attachment of spindle microtubules to kinetochore                                                                         | 17         | 6               | 1.46E-05 | 0.0030   |
| GO:0034622                                                    | cellular macromolecular complex assembly                                                                                  | 528        | 37              | 3.17E-05 | 0.0059   |
| GO:0051983                                                    | regulation of chromosome segregation                                                                                      | 22         | 6               | 7.61E-05 | 0.0131   |
| GO:0071824                                                    | protein-DNA complex subunit organization                                                                                  | 124        | 14              | 9.31E-05 | 0.0158   |
| GO:0051254                                                    | positive regulation of RNA metabolic process                                                                              | 1026       | 56              | 0.0004   | 0.0470   |
| GO:0006284                                                    | base-excision repair                                                                                                      | 40         | 7               | 0.0004   | 0.0498   |
| GO:0051383                                                    | kinetochore organization                                                                                                  | 12         | 4               | 0.0006   | 0.0663   |
| GO:0006298                                                    | mismatch repair                                                                                                           | 21         | 5               | 0.0006   | 0.0702   |
| GO:0061640                                                    | cytoskeleton-dependent cytokinesis                                                                                        | 21         | 5               | 0.0006   | 0.0702   |
| GO:0010557                                                    | positive regulation of macromolecule biosynthetic process                                                                 | 1152       | 60              | 0.0007   | 0.0820   |
| GO:0006396                                                    | RNA processing                                                                                                            | 534        | 33              | 0.0008   | 0.0906   |
| The enriched biological pathways of ER positive breast cancer |                                                                                                                           |            |                 |          |          |
| GO:0000278                                                    | mitotic cell cycle                                                                                                        | 760        | 60              | <1.0E-16 | <1.0E-16 |
| GO:0007017                                                    | microtubule-based process                                                                                                 | 385        | 32              | 1.35E-13 | 1.56E-10 |
| GO:0007059                                                    | chromosome segregation                                                                                                    | 130        | 19              | 9.39E-13 | 9.99E-10 |
| GO:0006271                                                    | DNA strand elongation involved in DNA replication                                                                         | 32         | 6               | 1.65E-05 | 0.0031   |
| GO:0051983                                                    | regulation of chromosome segregation                                                                                      | 22         | 5               | 3.22E-05 | 0.0050   |
| GO:0002460                                                    | adaptive immune response based on somatic recombination of immune receptors built from immunoglobulin superfamily domains | 175        | 12              | 5.69E-05 | 0.0083   |
| GO:0050870                                                    | positive regulation of T cell activation                                                                                  | 162        | 11              | 0.0001   | 0.0153   |
| GO:0002449                                                    | lymphocyte mediated immunity                                                                                              | 164        | 11              | 0.0001   | 0.0167   |
| GO:0051607                                                    | defense response to virus                                                                                                 | 166        | 11              | 0.0002   | 0.0181   |
| GO:0006310                                                    | DNA recombination                                                                                                         | 178        | 11              | 0.0003   | 0.0286   |
| GO:0006909                                                    | phagocytosis                                                                                                              | 154        | 10              | 0.0004   | 0.0334   |
| GO:0051782                                                    | negative regulation of cell division                                                                                      | 9          | 3               | 0.0004   | 0.0362   |
| GO:0031497                                                    | chromatin assembly                                                                                                        | 81         | 7               | 0.0005   | 0.0438   |
| GO:0001895                                                    | retina homeostasis                                                                                                        | 39         | 5               | 0.0006   | 0.0458   |
| GO:0006268                                                    | DNA unwinding involved in DNA replication                                                                                 | 10         | 3               | 0.0006   | 0.0476   |
| GO:0034728                                                    | nucleosome organization                                                                                                   | 92         | 7               | 0.0011   | 0.0835   |
| GO:0006270                                                    | DNA replication initiation                                                                                                | 27         | 4               | 0.0012   | 0.0843   |

Supplementary Table S3: The enriched molecular functions by the DEGs in RD groups.

| GOid                                                          | Name                                                                             | Ref<br>num | Interest<br>num | <i>p</i> value | adjust <i>p</i> |
|---------------------------------------------------------------|----------------------------------------------------------------------------------|------------|-----------------|----------------|-----------------|
| The enriched molecular functions of ER negative breast cancer |                                                                                  |            |                 |                |                 |
| GO:0003677                                                    | DNA binding                                                                      | 1617       | 84              | 3.71E-05       | 0.0179          |
| GO:0003777                                                    | microtubule motor activity                                                       | 53         | 10              | 1.02E-05       | 0.0066          |
| GO:0005515                                                    | protein binding                                                                  | 6670       | 265             | 2.91E-05       | 0.0160          |
| GO:0017056                                                    | structural constituent of nuclear pore                                           | 9          | 4               | 1.48E-04       | 0.0571          |
| GO:0043566                                                    | structure-specific DNA binding                                                   | 207        | 18              | 2.64E-04       | 0.0923          |
| GO:0044822                                                    | poly(A) RNA binding                                                              | 902        | 56              | 7.86E-06       | 6.06E-03        |
| The enriched molecular functions of ER positive breast cancer |                                                                                  |            |                 |                |                 |
| GO:0003823                                                    | antigen binding                                                                  | 65         | 7               | 1.01E-04       | 0.0444          |
| GO:0004748                                                    | ribonucleoside-diphosphate reductase activity, thioredoxin disulfide as acceptor | 2          | 2               | 2.79E-04       | 0.0716          |
| GO:0005524                                                    | ATP binding                                                                      | 1130       | 36              | 1.04E-04       | 0.0444          |
| GO:0008017                                                    | microtubule binding                                                              | 134        | 13              | 3.57E-07       | 7.21E-04        |
| GO:0019901                                                    | protein kinase binding                                                           | 365        | 18              | 3.96E-05       | 0.0305          |
| GO:0043548                                                    | phosphatidylinositol 3-kinase binding                                            | 17         | 4               | 1.52E-04       | 0.0495          |

Supplementary Table S4: The enriched cellular components by the DEGs in RD groups.

| GOid                                                          | Name                                     | Ref<br>num | Interest<br>num | <i>p</i> value | adjust <i>p</i> |
|---------------------------------------------------------------|------------------------------------------|------------|-----------------|----------------|-----------------|
| The enriched cellular components of ER negative breast cancer |                                          |            |                 |                |                 |
| GO:0000228                                                    | nuclear chromosome                       | 293        | 30              | 8.85E-08       | 5.90E-06        |
| GO:0000779                                                    | condensed chromosome, centromeric region | 74         | 11              | 4.17E-05       | 1.57E-03        |
| GO:0000796                                                    | condensin complex                        | 6          | 3               | 7.50E-04       | 0.0200          |
| GO:0005643                                                    | nuclear pore                             | 61         | 8               | 1.10E-03       | 0.0282          |
| GO:0005654                                                    | nucleoplasm                              | 1236       | 96              | 5.11E-15       | 9.35E-13        |
| GO:0005657                                                    | replication fork                         | 45         | 10              | 2.27E-06       | 1.27E-04        |
| GO:0005730                                                    | nucleolus                                | 544        | 36              | 1.26E-04       | 4.02E-03        |
| GO:0005762                                                    | mitochondrial large ribosomal subunit    | 8          | 4               | 8.69E-05       | 2.83E-03        |
| GO:0005813                                                    | centrosome                               | 312        | 22              | 1.17E-03       | 0.0289          |
| GO:0005819                                                    | spindle                                  | 208        | 35              | 4.00E-15       | 8.36E-13        |
| GO:0031464                                                    | Cul4A-RING E3 ubiquitin ligase complex   | 8          | 3               | 2.00E-03       | 0.0450          |
| GO:0034399                                                    | nuclear periphery                        | 97         | 11              | 4.89E-04       | 0.0141          |
| GO:0045120                                                    | pronucleus                               | 16         | 4               | 1.81E-03       | 0.0422          |
| GO:1990234                                                    | transferase complex                      | 449        | 33              | 3.25E-05       | 1.25E-03        |
| The enriched cellular components of ER positive breast cancer |                                          |            |                 |                |                 |
| GO:0000779                                                    | condensed chromosome, centromeric region | 74         | 11              | 5.10E-08       | 1.25E-05        |
| GO:0000796                                                    | condensin complex                        | 6          | 3               | 9.83E-05       | 5.14E-03        |
| GO:0005615                                                    | extracellular space                      | 943        | 33              | 7.23E-05       | 4.07E-03        |
| GO:0005654                                                    | nucleoplasm                              | 1236       | 44              | 2.16E-06       | 2.11E-04        |
| GO:0005680                                                    | anaphase-promoting complex               | 14         | 3               | 1.61E-03       | 0.0591          |
| GO:0005813                                                    | centrosome                               | 312        | 19              | 1.93E-06       | 2.02E-04        |
| GO:0005819                                                    | spindle                                  | 208        | 23              | 1.17E-12       | 8.59E-10        |
| GO:0005871                                                    | kinesin complex                          | 37         | 5               | 4.10E-04       | 0.0177          |
| GO:0042105                                                    | alpha-beta T cell receptor complex       | 5          | 2               | 2.88E-03       | 0.0886          |
| GO:0044815                                                    | DNA packaging complex                    | 49         | 6               | 1.87E-04       | 9.47E-03        |
| GO:0045120                                                    | pronucleus                               | 16         | 3               | 2.42E-03       | 0.0788          |
| GO:0071756                                                    | pentameric IgM immunoglobulin complex    | 2          | 2               | 2.98E-04       | 0.0132          |
